# Supplementary material for: Characterization and Temperature Dependence of Arctic Micromonas polaris Viruses
Source: Viruses. 2017 Jun 2;9(6):134. doi: 10.3390/v9060134 (PMC5490811; doi:10.3390/v9060134)
Supplement: Supplementary file 1 [file viruses-09-00134-s001.pdf]

## Supplementary material:

**Table S1:** Phytoplankton genera and species from different phyla that were tested for infection by the Arctic *Micromonas* virus isolates MpoV-44T, 45T, 46T and 47T. In none of the cultures occurred lysis. Cultures were maintained at 3 °C (except for *Ostreococcus* which was cultured at 15 °C) in MIX-TX medium at 16:8h light:dark and 70–90  $\mu\text{mol quanta m}^{-2} \text{s}^{-1}$  (see for details Materials & Methods). Species depicted with TX\* are from the Netherlands Institute for Sea Research (NIOZ) TX culture collection and were isolated from Kongsfjorden at the same time as *Micromonas* TX-01. RUG\*\* is from the culture collection of the University of Groningen (RuG), The Netherlands.

| Phytoplankton species                   | Location of isolation |
|-----------------------------------------|-----------------------|
| <i>Phaeocystis</i> sp. CCMP1374         | Southern Ocean        |
| <i>Phaeocystis antarctica</i> CCMP1871  | Southern Ocean        |
| <i>Phaeocystis Antarctica</i> TX17      | Southern Ocean        |
| <i>Imantonia</i> sp. TX*                | Kongsfjorden          |
| <i>Chrysochromulina</i> sp. CCMP1215    | Bellingshausen Sea    |
| <i>Chlamydomonas</i> sp. CCMP681        | Bellingshausen Sea    |
| <i>Pyramimonas</i> sp. RuG**            | Southern Ocean        |
| <i>Rhodomonas</i> sp. TX*               | Kongsfjorden          |
| <i>Proboscica alata</i> TX22            | Southern Ocean        |
| <i>Fragilariopsis kerguelensis</i> TX18 | Southern Ocean        |
| <i>Chaetoceros dictyota</i> TX19        | Southern Ocean        |
| <i>Chaetoceros debilis</i> TX20         | Southern Ocean        |
| <i>Chaetoceros brevis</i> TX21          | Kongsfjorden          |
| <i>Thalassiosira hispida</i> TX*        | Kongsfjorden          |
| <i>Porosira glacialis</i> CCMP650       | Narragansett Bay      |
| <i>Ostreococcus tauri</i> RCC745        | Mediterranean Sea     |

**Table S2:** *P*-values of the burst size differences between groups, as tested by 1-way ANOVAs, to demonstrate inter- and intra-strain differences (e.g. for RCC2257 increasing temperature leads to significantly increased burst sizes of both viruses, but for RCC2258 this is only found for MpoV-45T). For each host strain, the effect of the used virus (44T x 45T) or temperature (3 °C x 8 °C) on burst size was tested within each separate treatment. Significant differences are depicted in bold.

|         | 3 °C<br>44T x 45T | 8 °C<br>44T x 45T | 44T<br>3°C x 8°C | 45T<br>3°C x 8°C |
|---------|-------------------|-------------------|------------------|------------------|
| TX-01   | 0.493             | -                 | -                | -                |
| RCC2257 | 0.130             | 0.855             | <b>0.044</b>     | <b>0.045</b>     |
| RCC2258 | <b>0.008</b>      | <b>&lt;0.001</b>  | 0.227            | <b>0.003</b>     |

**Table S3:** Top 3 BLASTN hits of the isolates against KEGG environmental metagenomes with relevant information on sampling location and temperature. OSD: Ocean Sampling Day; TARA: TARA Oceans.

| Isolate | Campaign | Region         | Year | Temp (°C) | Identity | Sample                      |
|---------|----------|----------------|------|-----------|----------|-----------------------------|
| MpV46T  | OSD      | Greenland Sea  | 2014 | −1.6      | 85%      | OSD146_2014-06-21_5m_NPL022 |
|         | TARA     | Southern Ocean | 2001 | −0.8      | 84%      | 85_DCM_0d2-3                |
|         | TARA     | North Atlantic | 2003 | 17.3      | 83%      | 151_SUR_0d2-3               |
| MpV45T  | OSD      | Greenland Sea  | 2014 | 10.1      | 83%      | OSD130_2014-06-21_1m_NPL022 |
|         | OSD      | North Atlantic | 2014 | 12.8      | 88%      | OSD152_2014-06-20_1m_NPL022 |
|         | TARA     | Southern Ocean | 2012 | 7.3       | 81%      | 82_SRF_0d2-3                |
| MpV47T  | OSD      | North Atlantic | 2014 | 12.8      | 87%      | OSD152_2014-06-20_1m_NPL022 |
|         | OSD      | Greenland Sea  | 2014 | 10.1      | 82%      | OSD130_2014-06-21_1m_NPL022 |
|         | TARA     | South Atlantic | 2012 | 7.3       | 80%      | 82_SRF_0d2-3                |
| MpV44   | TARA     | Southern Ocean | 2001 | −0.8      | 80%      | 85_DCM_0d2-3                |
|         | TARA     | South Atlantic | 2009 | 12.8      | 80%      | 67_SUR_0d2-0d45             |
|         | TARA     | North Pacific  | 2010 | 13.2      | 79%      | 133_DCM_0d2-3               |

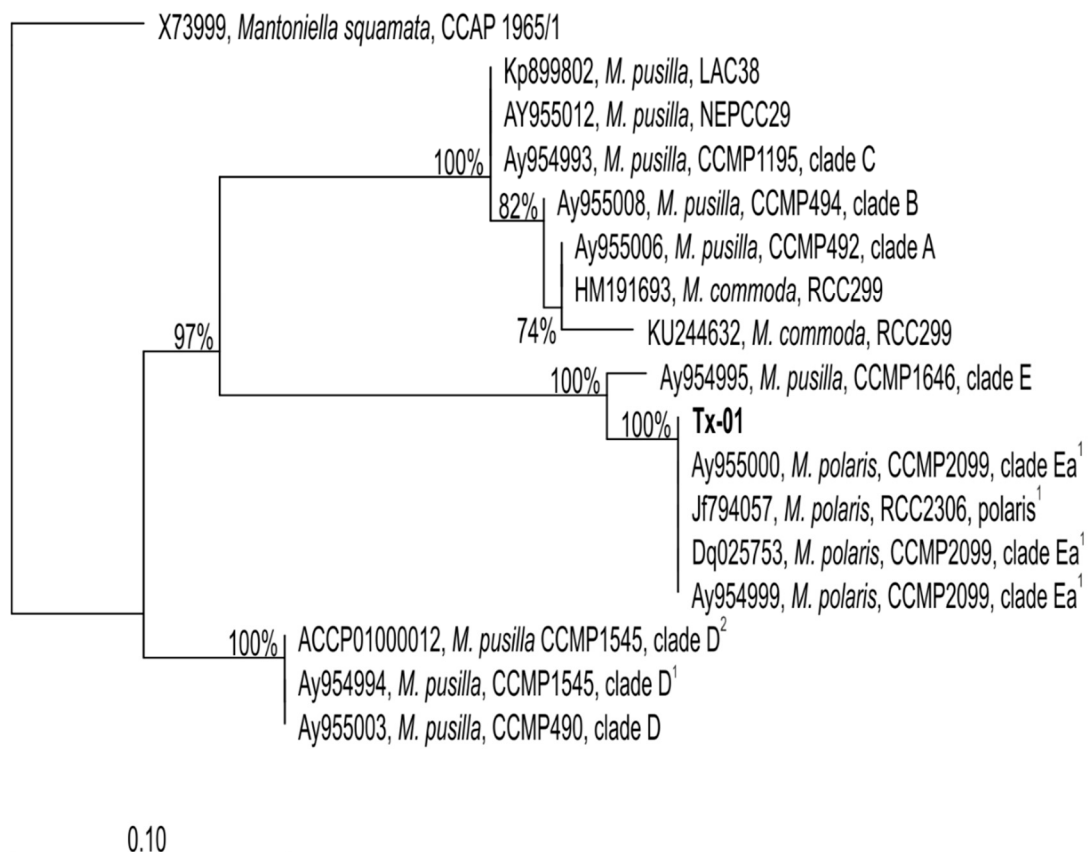

**Figure S1:** Position of strain TX-01 in a Maximum-Likelyhood dendrogram of 18S rRNA sequences (1574 valid columns) of *Micromonas* strains with clade designations A-E from Slapeta et al. [43] and Ea from Lovejoy et al. [16]. The letter M. stands for the genus *Micromonas*. <sup>1</sup> Simon et al. [48]; <sup>2</sup> Van Baren et al. [47].

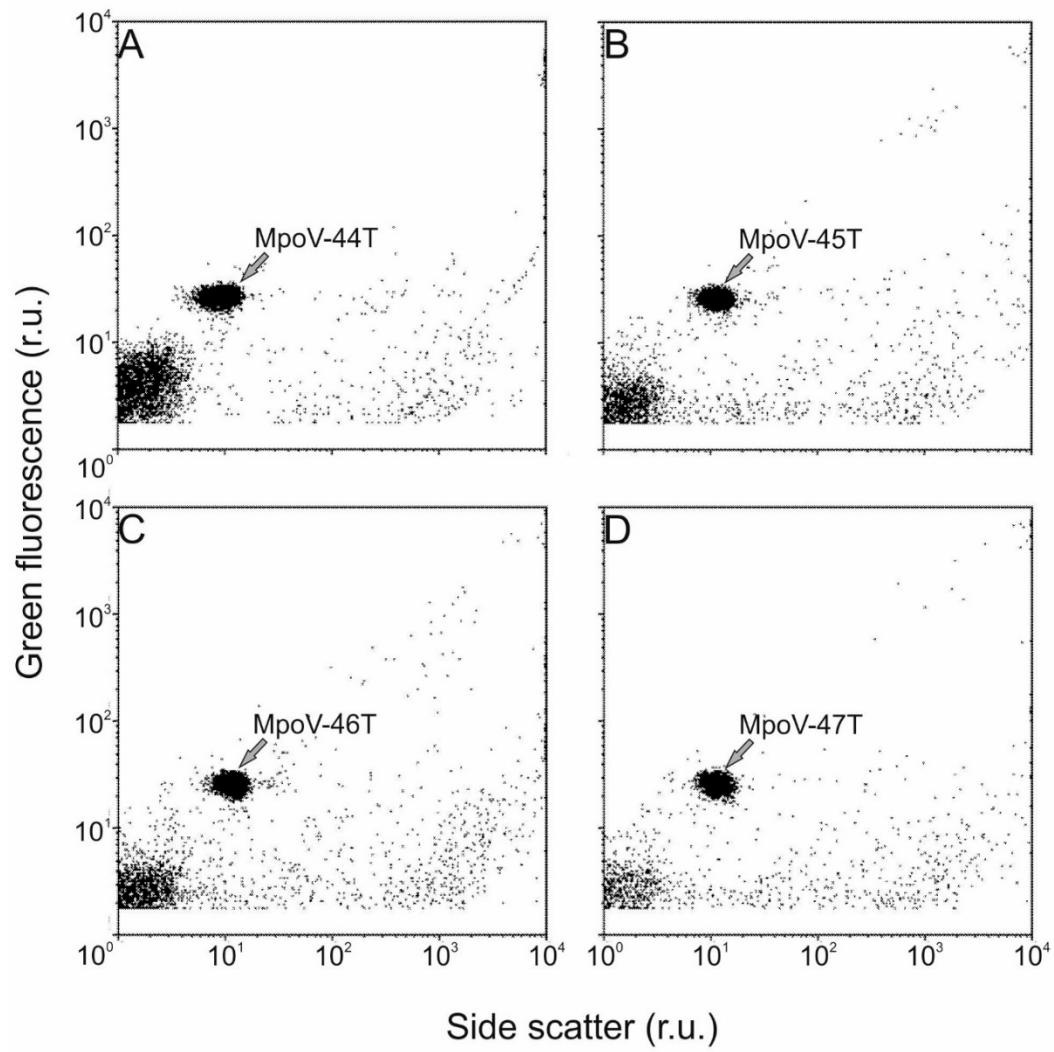

**Figure S2:** Flow cytograms of the four *Micromonas* virus strains MpoV-44T, 45T, 46T and 47T (A, B, C, D) with green fluorescence on the Y-axis and side scatter on the X-axis. The grey arrow, which is on the same location in each plot, indicates the MpV cluster.

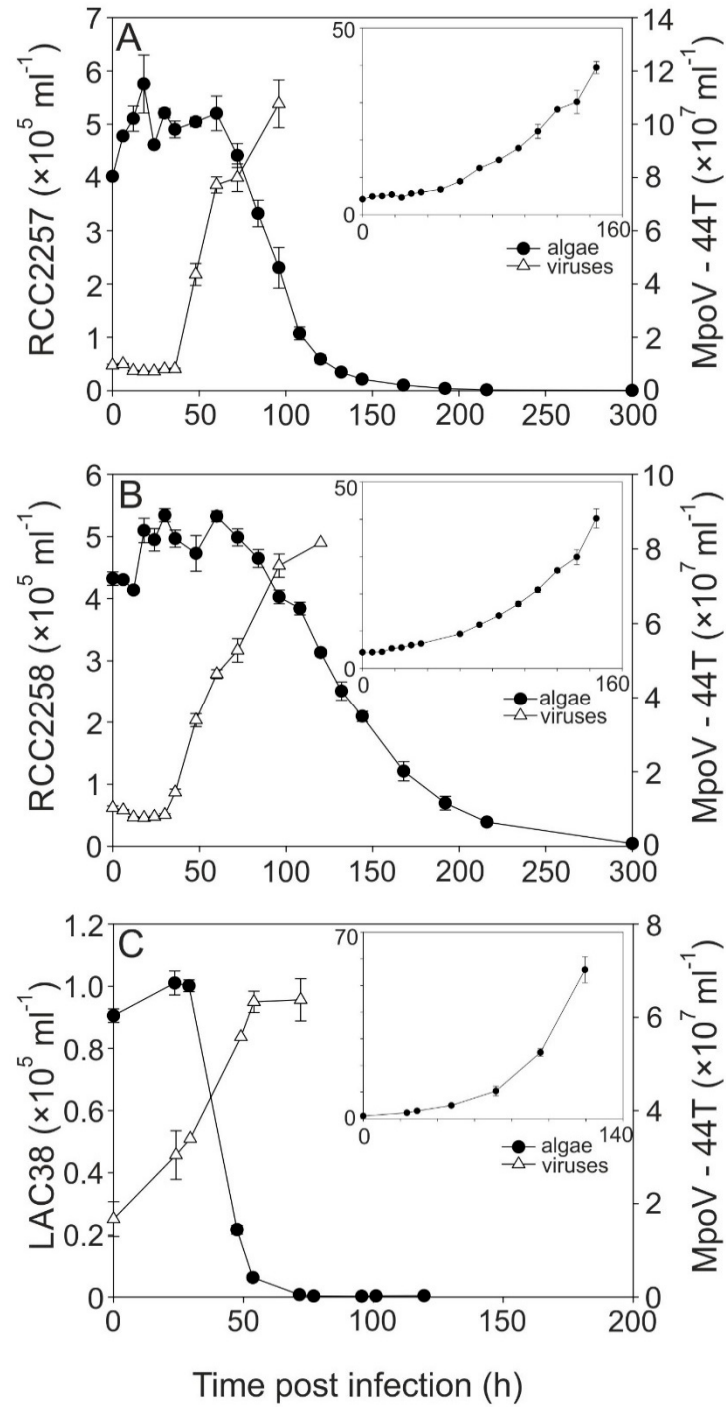

**Figure S3:** Growth curves of the infection cycle of MpoV-44T infecting *M. polaris* RCC2257 (A), *M. polaris* RCC2258 (B) and *M. commoda* LAC38 (C) as illustration of MpoV-44T - host combinations that do not show the growth extent of the infected TX-01 infected with this virus. Algal cell abundances (mean  $\pm$  s.d.;  $n=3$ ) are depicted as filled circles, of which the temporal dynamics of the infected cultures are shown in the main panel and those of the non-infected controls in the inlay panel. Viral abundances (mean  $\pm$  s.d.;  $n=3$ ) over time are depicted as open triangles. Invisible error bars fall within the symbol.

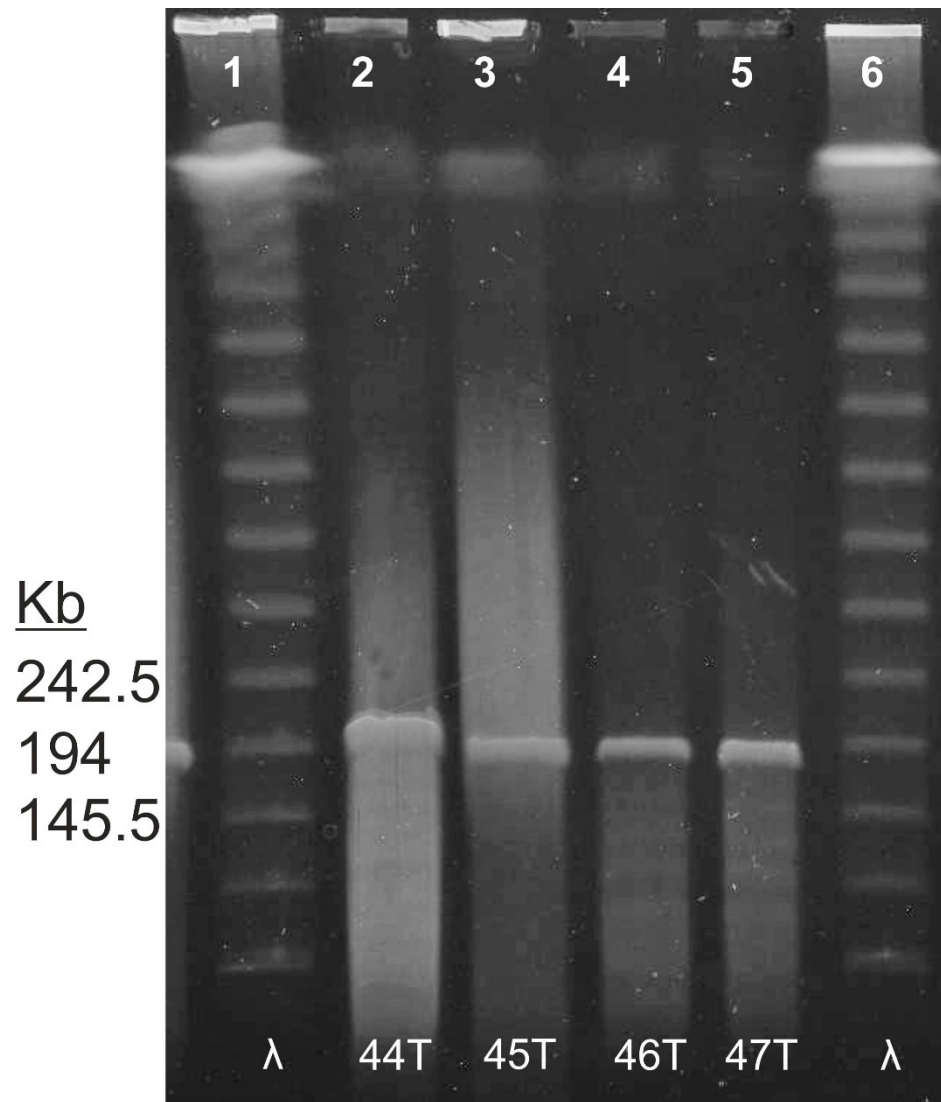

**Figure S4:** Photograph of a Pulse Field Gel Electrophoresis (PFGE) gel for viral genome size estimation. The virus isolates MpoV-44T to 47T are depicted below lanes 2 to 5. The DNA Lambda ladder is shown in lane 1 and 6 (indicated λ symbol), with the relevant band sizes in Kb on the left.
